# Supplementary material
Source: publisher figshare collection journal article supplement (https://tandf.figshare.com/articles/dataset/_/7543442)

**Figure A1.** Department A vehicle (primarily ambulances) adjusted odds ratios for crash and 95% confidence intervals for each driving rule in count, distance and time domains. Odds ratios greater than one indicate an increased risk of crash. Asterisk (*) indicates P<0.05. Em = Emergency.

**Figure A2.** Department B vehicle (primarily engines) adjusted odds ratio point estimates and 95% confidence intervals for each driving rule in count, distance and time domains. Odds ratios greater than one indicate an increased risk of crash. Asterisk (*) indicates P<0.05. Em = Emergency**.**

**Figure A3.** Receiver operating characteristic curve (ROC) of the final risk score model.


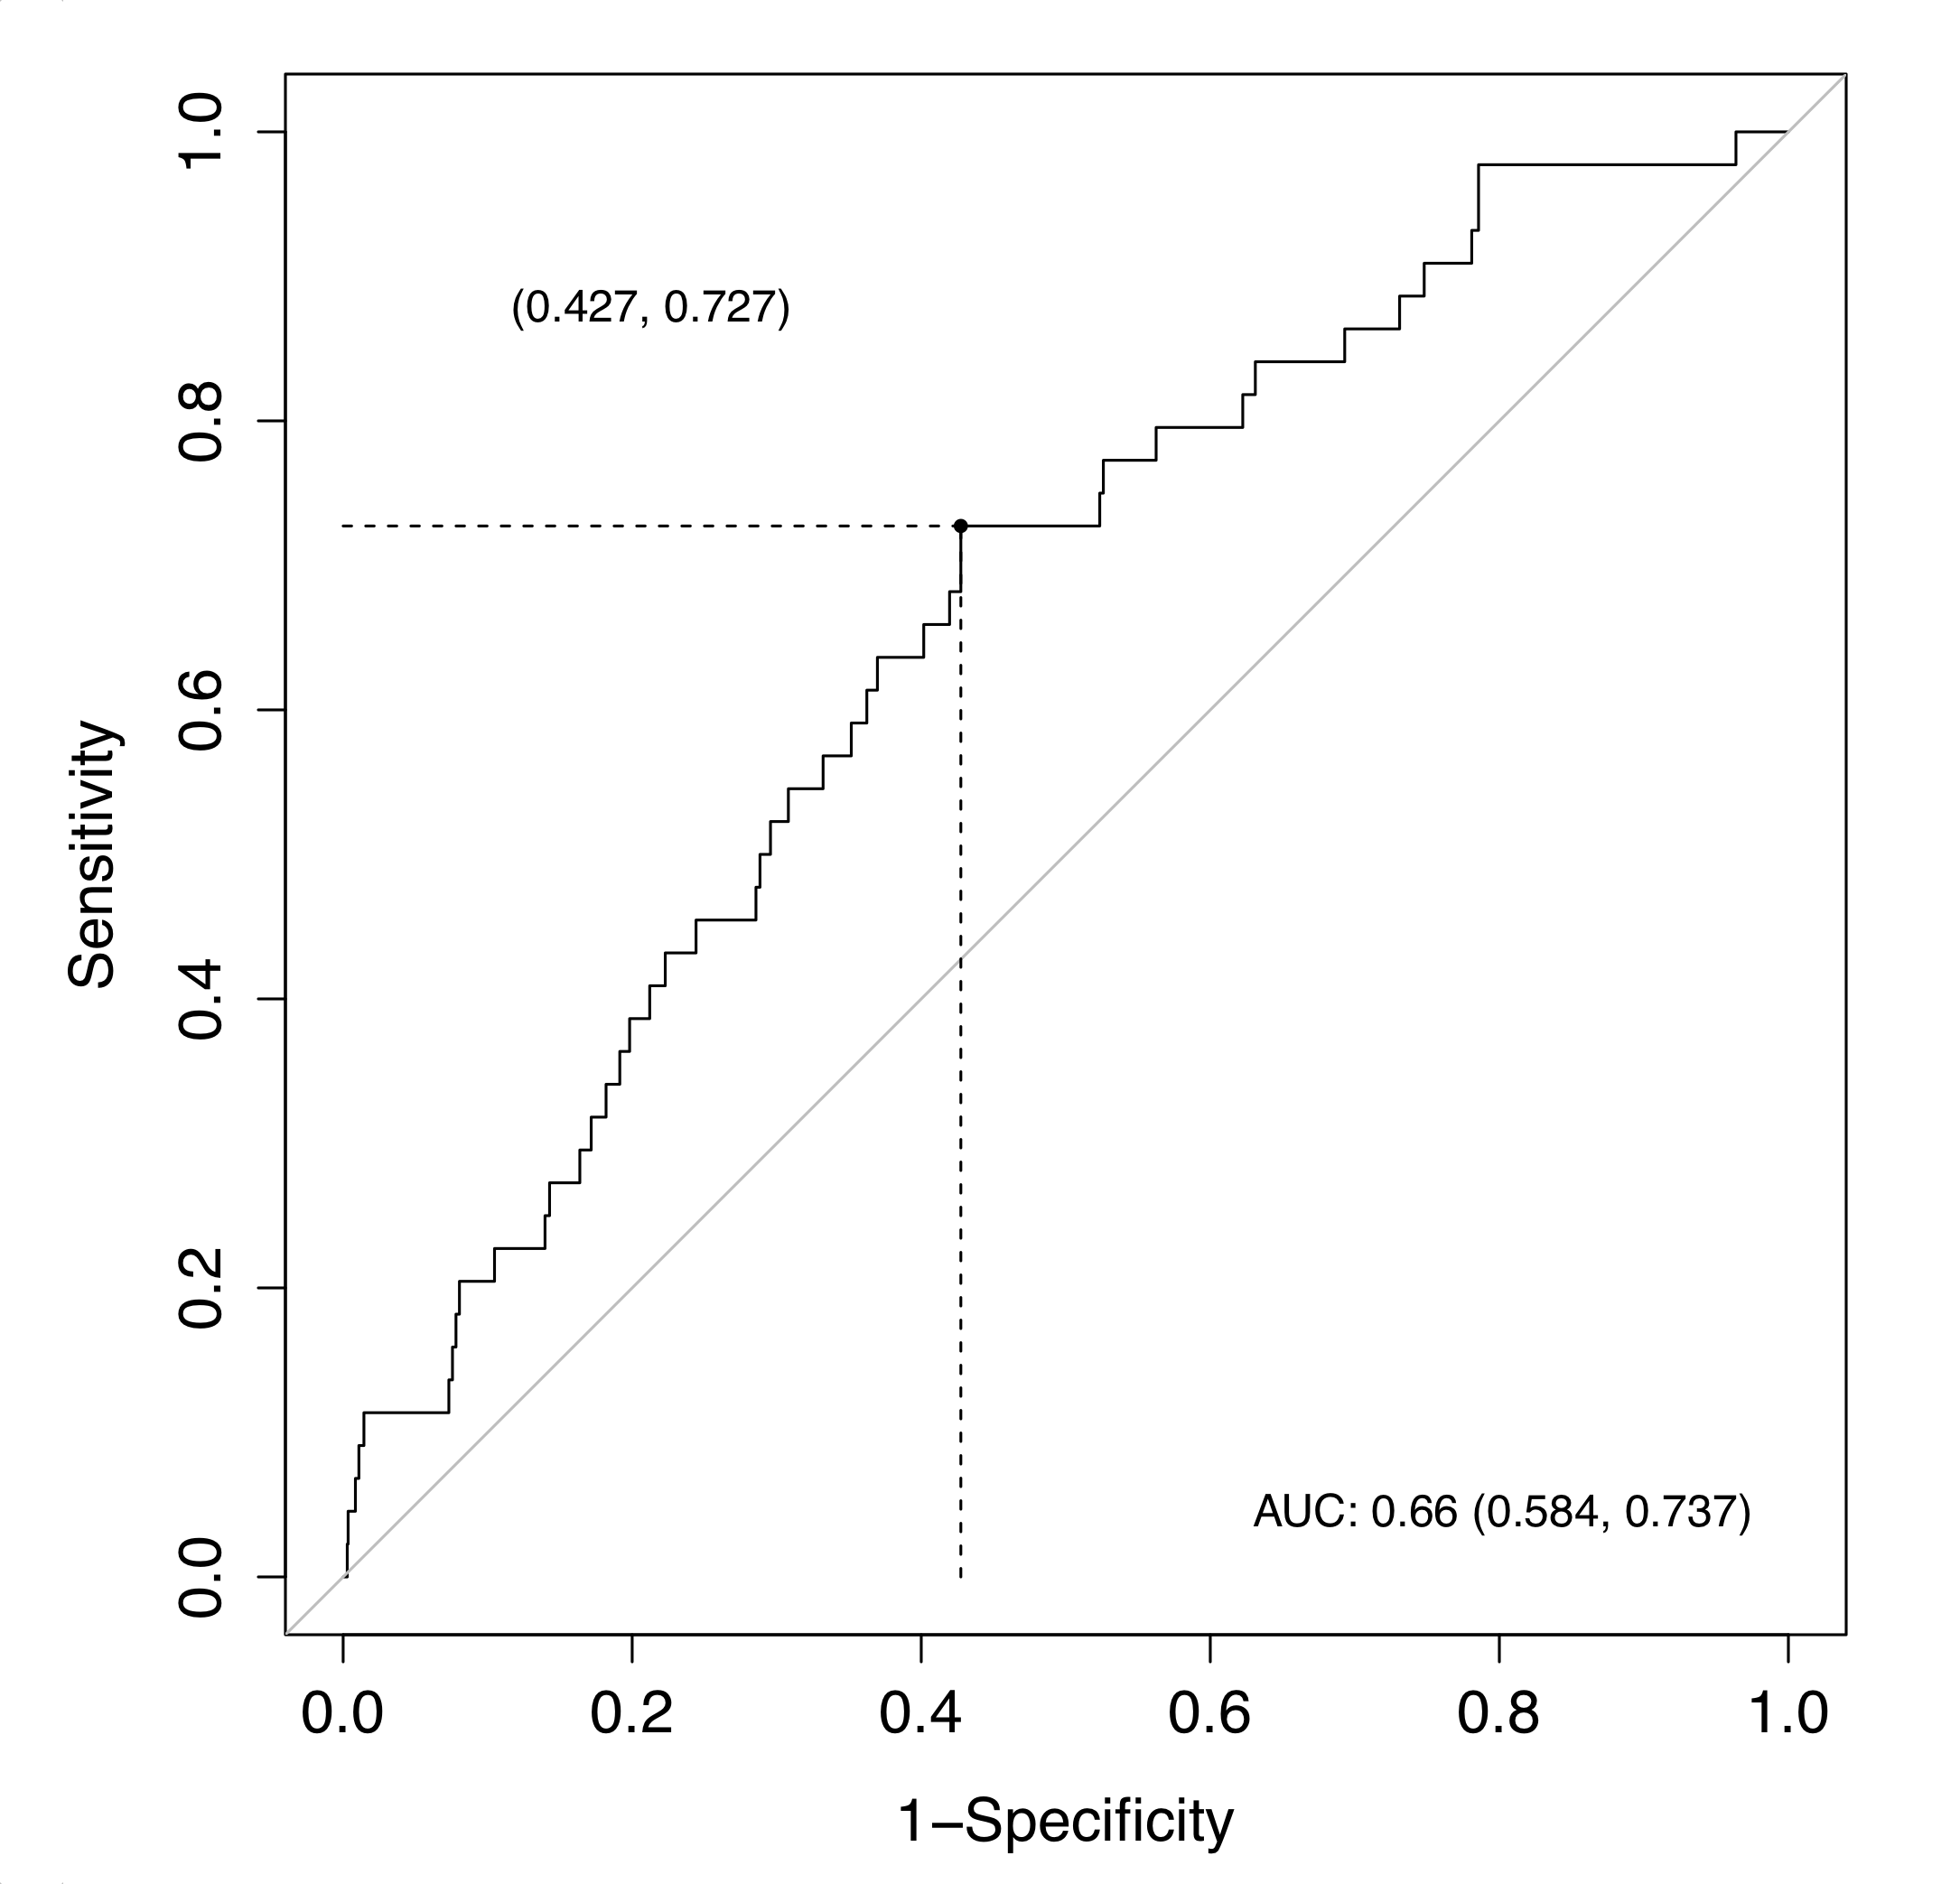

Supplement: Supplementary file 1 [file 1]
